# Supplementary material for: The polypharmacology browser: a web-based multi-fingerprint target prediction tool using ChEMBL bioactivity data
Source: PubMed Central journal article supplement (PMC5319934; doi:10.1186/s13321-017-0199-x), 2017-02-21
Supplement: 13321_2017_199_MOESM1_ESM.pdf [file 13321_2017_199_MOESM1_ESM.pdf]

Supporting Information for:

**The polypharmacology browser: a web-based multi-fingerprint target prediction tool using ChEMBL bioactivity data**

Mahendra Awale and Jean-Louis Reymond\*

*Department of Chemistry and Biochemistry, University of Berne, Freiestrasse 3, 3012 Berne Switzerland; e-mail: [jean-louis.reymond@ioc.unibe.ch](mailto:jean-louis.reymond@ioc.unibe.ch); FAX: +41 31 631 80 57*

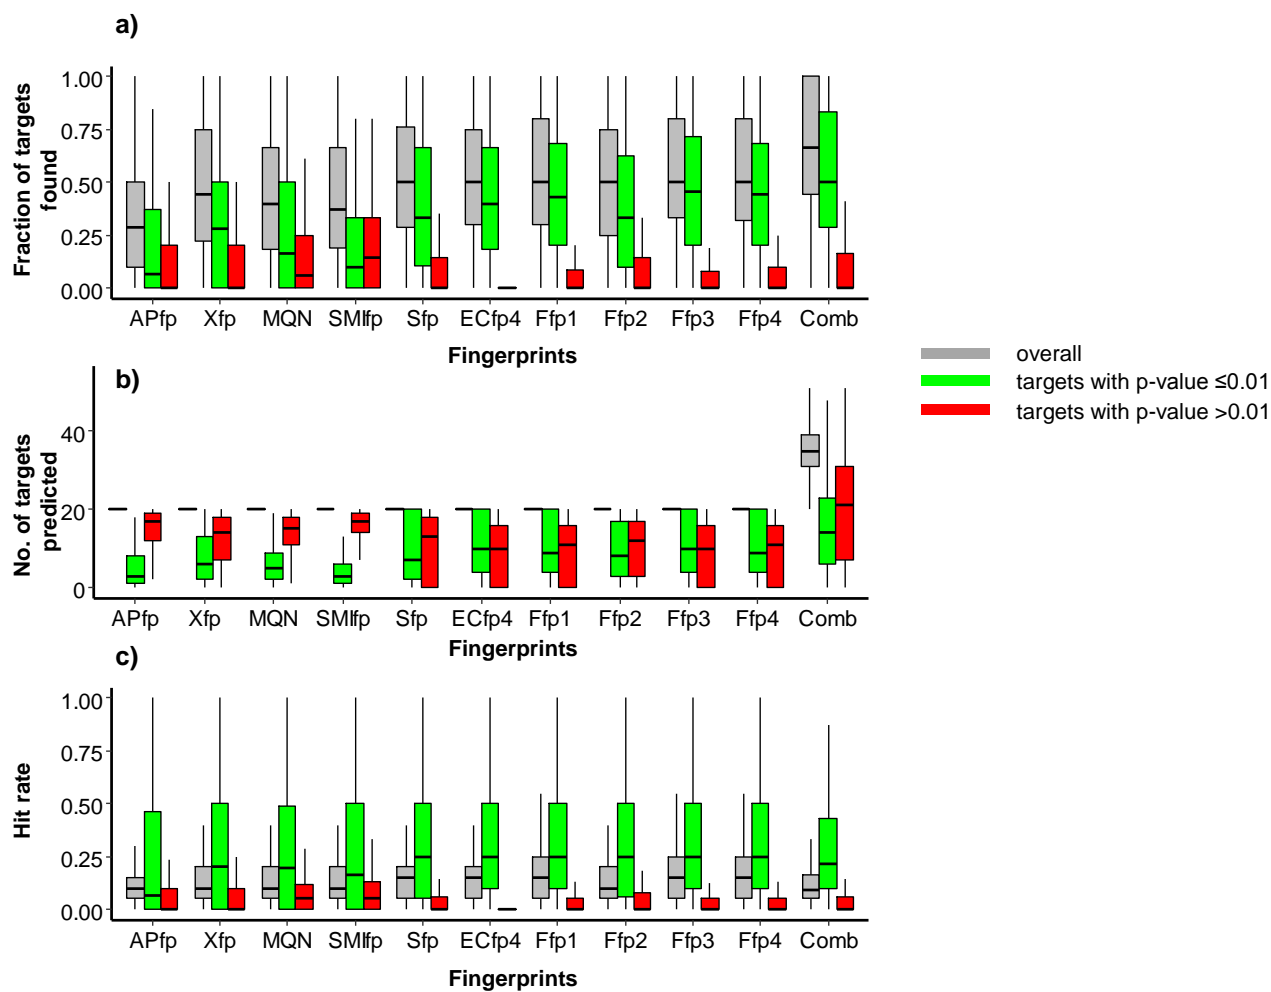

**Figure S1.** Recovery statistics of targets of 670 drugs by various fingerprints and combined method used in PPB. The box plots shows distribution of (a) fraction of known targets found, (b) number of targets predicted and (c) hit rate calculated for each of the 670 drugs (outliers are not shown). For each drug analysis was performed at three different levels considering all targets (grey), targets with p-value of  $\leq 0.01$  (green) and targets with p-value of  $> 0.01$  (red).

**Table S1.** Student t-test significance values for pair wise comparison of target prediction performance of all the fingerprints used in PPB.

| Fp/Fp <sup>a)</sup> | APfp     | Xfp      | MQN      | SMIfp    | Sfp      | ECfp     | Ffp1 | Ffp2    | Ffp3     | Ffp4 | Comb |
|---------------------|----------|----------|----------|----------|----------|----------|------|---------|----------|------|------|
| APfp                | 1        | 0        | 0        | 2.00E-05 | 0        | 0        | 0    | 0       | 0        | 0    | 0    |
| Xfp                 | 0        | 1.00     | 0.05     | 0.02     | 0.08     | 0.02     | 0.00 | 0.25    | 7.00E-05 | 0.00 | 0.00 |
| MQN                 | 0        | 0.05     | 1.00     | 0.72     | 2.00E-04 | 2.00E-05 | 0.00 | 0.00    | 0.00     | 0.00 | 0.00 |
| SMIfp               | 2.00E-05 | 0.02     | 0.72     | 1.00     | 4.00E-05 | 0.00     | 0.00 | 0.00    | 0.00     | 0.00 | 0.00 |
| Sfp                 | 0        | 0.08     | 2.00E-04 | 4.00E-05 | 1.00     | 0.61     | 0.13 | 0.54    | 0.02648  | 0.04 | 0.00 |
| ECfp                | 0        | 0.02     | 2.00E-05 | 0.00     | 0.61     | 1.00     | 0.31 | 0.26    | 0.08496  | 0.13 | 0.00 |
| Ffp1                | 0        | 0.00     | 0.00     | 0.00     | 0.13     | 0.31     | 1.00 | 0.03    | 0.49     | 0.63 | 0.00 |
| Ffp2                | 0        | 0.25     | 0.00     | 0.00     | 0.54     | 0.26     | 0.03 | 1.00    | 0.00     | 0.01 | 0.00 |
| Ffp3                | 0        | 7.00E-05 | 0.00     | 0.00     | 0.03     | 0.08     | 0.49 | 0.00466 | 1.00     | 0.83 | 0.00 |
| Ffp4                | 0        | 0.00     | 0.00     | 0.00     | 0.04     | 0.13     | 0.63 | 0.01    | 0.83     | 1.00 | 0.00 |
| Comb                | 0        | 0        | 0        | 0        | 0        | 0        | 0    | 0       | 0        | 0    | 1.00 |

<sup>a)</sup> t-test was performed using distribution of “Fraction of targets found” values considering all targets (Figure S1, grey). Significance values >0.05 are highlighted in red.

**Table S2.** Student t-test significance values for pair wise comparison of target prediction performance of all the fingerprints used in PPB.

| Fp/Fp <sup>a)</sup> | APfp     | Xfp  | MQN      | SMIfp    | Sfp  | ECfp | Ffp1     | Ffp2     | Ffp3     | Ffp4     | Comb     |
|---------------------|----------|------|----------|----------|------|------|----------|----------|----------|----------|----------|
| APfp                | 1        | 0    | 4.00E-05 | 0.94436  | 0    | 0    | 0        | 0        | 0        | 0        | 0        |
| Xfp                 | 0        | 1.00 | 0.00     | 0.00     | 0.00 | 0.00 | 0.00     | 0.01     | 0        | 0.00     | 0.00     |
| MQN                 | 4.00E-05 | 0.00 | 1.00     | 5.00E-05 | 0    | 0    | 0.00     | 0.00     | 0.00     | 0.00     | 0.00     |
| SMIfp               | 0.94436  | 0.00 | 5.00E-05 | 1.00     | 0    | 0.00 | 0.00     | 0.00     | 0.00     | 0.00     | 0.00     |
| Sfp                 | 0        | 0.00 | 0        | 0        | 1.00 | 0.03 | 0.01     | 0.63     | 0.00034  | 0.00     | 0.00     |
| ECfp                | 0        | 0.00 | 0        | 0.00     | 0.03 | 1.00 | 0.63     | 0.01     | 0.14773  | 0.35     | 0.00     |
| Ffp1                | 0        | 0.00 | 0.00     | 0.00     | 0.01 | 0.63 | 1.00     | 0.00     | 0.34     | 0.66     | 1.00E-05 |
| Ffp2                | 0        | 0.01 | 0.00     | 0.00     | 0.63 | 0.01 | 0.00     | 1.00     | 4.00E-05 | 0.00     | 0.00     |
| Ffp3                | 0        | 0    | 0.00     | 0.00     | 0.00 | 0.15 | 0.34     | 4.00E-05 | 1.00     | 0.60     | 0.00     |
| Ffp4                | 0        | 0.00 | 0.00     | 0.00     | 0.00 | 0.35 | 0.66     | 0.00     | 0.60     | 1.00     | 5.00E-05 |
| Comb                | 0        | 0    | 0        | 0        | 0    | 0    | 1.00E-05 | 0        | 0.00042  | 5.00E-05 | 1.00     |

<sup>a)</sup> t-test was performed using distribution of “Fraction of targets found” values considering targets with p-value of  $\leq 0.01$  (Figure S1, green). Significance values >0.05 are highlighted in red.

### Student t-test calculation

Student t-test was performed using R statistical software package version 3.2.5 with the default parameter setting (0.95 Confidence interval). The input to the student t-test was two different lists (corresponding to two different fingerprints) of 670 fraction of target found values. The t-test was repeated for all the possible pairs of fingerprints used in PPB considering all correctly predicted targets (Table S1) and targets with p-value of  $\leq 0.01$  (Table S2).
